# Supplementary material for: Effectiveness and safety of rhIGF1 therapy in patients with or without Laron syndrome
Source: PubMed Central journal article supplement (PMC7849377; doi:10.1530/eje-20-0325), 2020-11-17
Supplement: supplementary_material.pdf [file supplementary_material.pdf]

## Supplementary materials

### *Non-treatment-naïve and/or pubertal patient subgroup analysis*

More than half of both non-treatment-naïve/prepubertal subgroups were prepubertal. Although 81% of the non-treatment-naïve/prepubertal Laron syndrome subgroup received rhIGF-1 therapy prior to enrolment in the Eu-IGFD Registry (Table S1), patients had a significantly shorter stature, significantly higher BMI SDS and peak stimulated GH level, and were significantly more likely to have history of hypoglycaemia than the non-treatment-naïve/prepubertal patients without Laron syndrome at baseline (Table S2). The non-treatment-naïve/prepubertal Laron syndrome subgroup was treated with rhIGF-1 therapy for longer ( $P=0.004$ ) and had a higher starting dose compared with the non-treatment-naïve/prepubertal patients without Laron syndrome (median [Q1; Q3]: 90 [40; 100] versus 40 [40; 40]  $\mu\text{g}/\text{kg}$  BID;  $P=0.001$ ), however, no significant difference in doses were observed from years 1-5 (median: 112-120  $\mu\text{g}/\text{kg}$  BID). Changes in height, height velocity (Table S3 and S4), BMI and weight (Table S5 and S6) for the non-treatment-naïve/prepubertal subgroups should be interpreted with caution, due to the heterogeneity of the subgroups (Table S1).

### *Discussion of the non-treatment-naïve and/or pubertal patient subgroup data*

As expected, the non-treatment-naïve/prepubertal Laron syndrome subgroup had higher GH levels than the non-treatment-naïve/prepubertal patients without Laron syndrome at baseline, while the higher mean serum IGF-1 in the non-treatment-naïve/prepubertal Laron syndrome subgroup at baseline was not expected given that levels of IGF-binding protein-3 and ALS are GH-dependent. However, a high percentage of the non-treatment-naïve/prepubertal Laron syndrome subgroup had been previously treated with rhIGF-1 therapy, which may have elevated the baseline IGF-1 levels, depending on how soon treatment occurred prior to sample collection [1].

The heterogeneity of the non-treatment-naïve/prepubertal subgroups does not allow for meaningful reporting, therefore we refrain from interpreting the effectiveness of rhIGF-1 therapy in these patients. The majority of patients in the non-treatment-naïve/prepubertal Laron syndrome subgroup were likely to have had their catch-up growth prior to entering the Eu-IGFD Registry, and therefore were not expected to gain much additional height during pubertal years. This has been observed in patients with GH deficiency receiving GH for many prepubertal years [2] and is also in accordance with the dynamics of catch-up growth in response to rhIGF-1 therapy in patients with Laron syndrome/SPIGFD reported here. Again, these data should be interpreted with caution until adult height data analyses are available.

## Eu-IGFD Registry Study Group – active sites

**Austria:** D. Furthner, G. Hausler, K. Zwiauer; **Belgium:** M.C. Lebrethon, J. de Schepper; **France:** P. Adiceam, C. Braun, B. Cammas, M. Cartigny, C. Cessans\*, C. Cessans<sup>†</sup>, M. Cogne, R. Coutant, M. de Kerdanet, C. Gayet (previously E. Mallet), P. Hassler, M. Houang, A. Lienhardt, A. Linglart, N. Lucidarme, F. M'Bou, H. Malpuech-Rouffet, M. Nicolino, F. Njuieyon, M. Pinget, M. Polak, R. Reynaud, P.F. Souchon, M.T. Tauber, K. Wagner; **Germany:** S. Al Sawaf, M. Bald, S. Bechtold, M. Bettendorf J.-G. Blanke, K. Cordula, D. Dunstheimer, A. Enniger (previously H. Leichter), M. Frühwald, C. Grasmann, K. Hartmann, B. Hauffa, E. Hammer, P.-M. Holterhus, A. Hübner, J. Ittner, C. Jourdan, A. Keller, H.S. Kim-Berger, B. Köster (previously Rosenbaum), J. Krüger (previously Richter-Unruh), P. Kuhnle coinv, C. Land, F. Lorenzen, M. Marx, T. Meissner, K. Mohnike, M. Morlot, H. Müller, P. Müller, C. Ockert, R. Oeverink, K. Palm, C.-J. Partsch, T. Reinehr, T. Rohrer, E. Schönau, E. Schulz, K.

Schwab, G. Simic-Shleicher, B. Tittel, K. Warncke, J. Wölfle; **Italy:** C. Bizzarri, S. Cannavò, M. Cappa, V. Cherubini, O. Cotta, G. Citro, D. Concolino, M-F. Fainza (previously L. Cavallo), G. Festa, D. Fintini, P. Francesco Perri, G. Garbetta, L. Guazzarotti, A. Lampis, S. Longhi, E. Marchesi, S. Mauri, M. Maghnie, R. Minelli, E. Miraglia Del Giudice, A. Moscillo, G. Patti, L. Perrone, A. Pilotta, S. Rabbiosi, A. Sinisi, G. Tornese, G. Weber (previously G. Chuimello), S. Zucchini; **Netherlands:** A. Hokken-Koelega, **Poland:** I. Ben-Skowronek, D. Birkholz, A. Bossowski, A. Dudek, M. Hilczer, A. Kedzia, K. Majewska, M. Niedziela, B. Rabska-Pietrzak, K. Stozek, J. Smyczynska, G. Zandwijken; **Spain:** J. Argente, C. Bezanilla, M-F. Borrás, M. Caimari, R. Diaz, A. Feliu-Rovira, C. Fernandez, M. Ferrer, E. Gallego, A Gutierrez, F. Hermoso, A. Lechuga-Sancho, C. Luzuriaga, J. Martos, M-F. Moreno-Macian, C. Pavia, P. Prieto, C. Rodriguez, A. Vela, D. Yeste; **Sweden:** P. Bang, A. Holmgren (previously N.-Ö. Nilsson), A. Tidblad; **United Kingdom:** F. Ahmed, L. Denvir, H. Johnstone, T. Mushtaq, L. Patel, C. Peters, R. Ramakrishnan, S. Rose, N. Shaw, H. Storr.

\*Catie Cessans; † Catherine Cessans

## References

1. Ekstrom K, Carlsson-Skwirut C, Ritzen EM & Bang P. Insulin-like growth factor-I and insulin-like growth factor binding protein-3 cotreatment versus insulin-like growth factor-I alone in two brothers with growth hormone insensitivity syndrome: effects on insulin sensitivity, body composition and linear growth. *Horm Res Paediatr* 2011 **76** 355-366.
2. Polak M, Blair J, Kotnik P, Pournara E, Pedersen BT & Rohrer TR. Early growth hormone treatment start in childhood growth hormone deficiency improves near adult height: analysis from NordiNet(R) International Outcome Study. *Eur J Endocrinol* 2017 **177** 421-429.
