# Supplementary material for: Effectiveness and safety of rhIGF1 therapy in patients with or without Laron syndrome
Source: PubMed Central journal article supplement (PMC7849377; doi:10.1530/eje-20-0325), 2020-11-17
Supplement: supplementary_table_1.pdf [file supplementary_table_1.pdf]

**Table S1:** Puberty and previous treatment status of the non-treatment-naïve/prepubertal subgroups (Enrolled population)

| <b>Treatment status</b>      | <b>Non-NPP-Laron syndrome<br/>(N = 17)</b> | <b>Non-NPP-non-Laron syndrome<br/>(N = 87)</b> |
|------------------------------|--------------------------------------------|------------------------------------------------|
| <b>Pubertal naïve</b>        | 6%                                         | 25%                                            |
| <b>Pubertal non-naïve</b>    | 38%                                        | 18%                                            |
| <b>GH</b>                    | 33%                                        | 93%                                            |
| <b>rhIGF-1</b>               | 100%                                       | 27%                                            |
| <b>Steroids</b>              | -                                          | 20%                                            |
| <b>GH and rhIGF-1</b>        | 33%                                        | 20%                                            |
| <b>Prepubertal non-naïve</b> | 56%                                        | 58%                                            |
| <b>GH</b>                    | 33%                                        | 94%                                            |
| <b>rhIGF-1</b>               | 67%                                        | 14%                                            |
| <b>GH and rhIGF-1</b>        | -                                          | 8%                                             |
| <b>Steroids</b>              | -                                          | 2%                                             |

Naïve patients are defined as patients without previous growth promoting therapy except corticosteroids. Patients treated with both GH and IGF-1 are also counted in the separate GH and rhIGF-1 categories. GH, growth hormone; IGF-1; insulin-like growth factor-1; non-NPP, not treatment naïve and/or pubertal.
