# Supplementary material for: Effectiveness and safety of rhIGF1 therapy in patients with or without Laron syndrome
Source: PubMed Central journal article supplement (PMC7849377; doi:10.1530/eje-20-0325), 2020-11-17
Supplement: supplementary_table_2.pdf [file supplementary_table_2.pdf]

**Table S2:** Non-treatment naïve/pubertal patient characteristics at baseline, with or without Laron syndrome (Enrolled population)

|                                                                               | Non-NPP-Laron syndrome<br>(N = 17) |                                                     | Non-NPP-non-Laron syndrome<br>(N = 87) |                                                     | P values <sup>a</sup> |
|-------------------------------------------------------------------------------|------------------------------------|-----------------------------------------------------|----------------------------------------|-----------------------------------------------------|-----------------------|
|                                                                               | N <sup>b</sup>                     |                                                     | N <sup>b</sup>                         |                                                     |                       |
| <b>Female, n (%)</b><br>95% CI                                                | 17                                 | 7 (41.2)<br>21.6; 64.0                              | 87                                     | 28 (32.2)<br>23.3; 42.6                             | 0.473 <sup>c</sup>    |
| <b>Age at first injection, years</b><br>Mean (SD [95% CI])<br>Median (Q1; Q3) | 17                                 | 12.78 (3.73 [10.86; 14.70])<br>12.16 (10.72; 15.29) | 87                                     | 11.43 (3.58 [10.67; 12.20])<br>12.25 (8.74; 13.93)  | 0.272 <sup>w</sup>    |
| <b>Height, SDS</b><br>Mean (SD [95% CI])<br>Median (Q1; Q3)                   | 15                                 | -4.63 (1.51 [-5.47; -3.79])<br>-4.93 (-5.89; -3.30) | 77                                     | -3.61 (1.20 [-3.88; -3.34])<br>-3.25 (-4.33; -2.84) | 0.011 <sup>w</sup>    |
| <b>Height velocity, cm/year</b><br>Mean (SD [95% CI])<br>Median (Q1; Q3)      | 12                                 | 4.43 (1.23 [3.65; 5.21])<br>4.57 (3.69; 5.18)       | 52                                     | 4.70 (1.84 [4.19; 5.21])<br>4.53 (3.70; 5.60)       | 0.884 <sup>w</sup>    |
| <b>Weight, SDS</b><br>Mean (SD [95% CI])<br>Median (Q1; Q3)                   | 15                                 | -2.34 (1.28 [-3.05; -1.63])<br>-2.42 (-3.37; -1.17) | 79                                     | -3.28 (1.54 [-3.62; -2.93])<br>-2.92 (-4.10; -2.34) | 0.036 <sup>w</sup>    |
| <b>BMI, SDS</b>                                                               | 15                                 |                                                     | 71                                     |                                                     | <0.001 <sup>w</sup>   |

|                                                     |    |                                  |    |                                  |                     |
|-----------------------------------------------------|----|----------------------------------|----|----------------------------------|---------------------|
| Mean (SD [95% CI])                                  |    | 0.86 (1.56 [-0.00; 1.73])        |    | -0.97 (1.38 [-1.30; -0.65])      |                     |
| Median (Q1; Q3)                                     |    | 0.81 (-0.45; 1.85)               |    | -0.93 (-1.57; -0.27)             |                     |
| <b>Mother's height, cm</b>                          | 16 |                                  | 76 |                                  | -                   |
| Mean (SD [95% CI])                                  |    | 158.1 (10.2 [152.7; 163.5])      |    | 157.5 (9.2 [155.4; 159.6])       |                     |
| Median (Q1; Q3)                                     |    | 158.1 (148.7; 167.5)             |    | 158.0 (151.5; 163.6)             |                     |
| <b>Father's height, cm</b>                          | 17 |                                  | 76 |                                  | -                   |
| Mean (SD [95% CI])                                  |    | 173.2 (5.8 [170.2; 176.2])       |    | 171.4 (8.2 [169.6; 173.3])       |                     |
| Median (Q1; Q3)                                     |    | 172.0 (170.0; 178.0)             |    | 171.5 (165.3; 177.5)             |                     |
| <b>IGF-1, ng/mL</b>                                 | 13 |                                  | 78 |                                  | 0.153 <sup>w</sup>  |
| Mean (SD [95% CI])                                  |    | 261.41 (205.25 [137.38; 385.44]) |    | 148.74 (144.66 [116.12; 181.35]) |                     |
| Median (Q1; Q3)                                     |    | 246.00 (62.00; 462.00)           |    | 105.50 (60.00; 171.10)           |                     |
| <b>Peak stimulated GH level, ng/mL</b>              | 9  |                                  | 52 |                                  | <0.001 <sup>w</sup> |
| Mean (SD [95% CI])                                  |    | 62.77 (37.09 [34.25; 91.28])     |    | 23.95 (50.31 [9.94; 37.96])      |                     |
| Median (Q1; Q3)                                     |    | 55.00 (40.00; 72.90)             |    | 15.10 (7.45; 23.25)              |                     |
| <b>Primary diagnosis: SPIGFD<sup>†</sup>, n (%)</b> | 17 | 17 (100)                         | 87 | 63 (72.4)                        | -                   |
| 95% CI                                              |    | 81.6; 100                        |    | 62.2; 80.7                       |                     |
| <b>History of hypoglycaemia, n (%)</b>              | 17 | 5 (29.4)                         | 87 | 5 (5.7)                          | 0.010 <sup>f</sup>  |
| 95% CI                                              |    | 13.3; 53.1                       |    | 2.5; 12.8                        |                     |

Data are median Q1; Q3 unless stated otherwise. <sup>†</sup>including Laron syndrome, as reported by the investigator. <sup>a</sup>Non-NPP-Laron syndrome versus Non-NPP-non-Laron syndrome. <sup>b</sup>Number of patients with available data; (c) Chi-square test; (f) Fisher's test; (w) Wilcoxon test. BMI, body mass index; GH, growth

hormone; IGF-1; insulin-like growth factor-1; NPP, treatment-naïve and prepubertal; SD, standard deviation; SDS, standard deviation score; SPIGFD, severe primary IGF-1 deficiency.
