# Supplementary material for: Effectiveness and safety of rhIGF1 therapy in patients with or without Laron syndrome
Source: PubMed Central journal article supplement (PMC7849377; doi:10.1530/eje-20-0325), 2020-11-17
Supplement: supplementary_table_3.pdf [file supplementary_table_3.pdf]

**Table S3.** Effect of rhIGF-1 therapy on height SDS in the non-treatment-naïve/prepubertal cohort (Registry population)

|         |                               |              | Change from baseline |                    |                                   |              |    | Change from baseline |  |
|---------|-------------------------------|--------------|----------------------|--------------------|-----------------------------------|--------------|----|----------------------|--|
|         | N                             | Mean (SD)    | N                    | Mean (95% CI)      | N                                 | Mean (SD)    | N  | Mean (95% CI)        |  |
|         | <b>Non-NPP-LS</b><br>(n = 17) |              |                      |                    | <b>Non-NPP-non-LS</b><br>(n = 86) |              |    |                      |  |
| 1 year  | 14                            | -4.27 (1.60) | 14                   | 0.19 (-0.10; 0.48) | 70                                | -3.40 (1.32) | 62 | 0.24 (0.13; 0.36)    |  |
| 2 years | 14                            | -4.32 (1.57) | 13                   | 0.55 (0.18; 0.92)  | 47                                | -3.16 (1.54) | 41 | 0.49 (0.25; 0.72)    |  |
| 3 years | 10                            | -4.68 (1.82) | 9                    | 0.34 (-0.07; 0.75) | 33                                | -3.06 (1.58) | 27 | 0.66 (0.27; 1.04)    |  |
| 4 years | 9                             | -4.39 (1.92) | 8                    | 0.51 (-0.01; 1.04) | 23                                | -3.35 (1.71) | 18 | 0.75 (0.38; 1.12)    |  |
| 5 years | 4                             | -5.12 (1.36) | 4                    | -                  | 11                                | -3.47 (2.22) | 10 | 0.61 (0.02; 1.20)    |  |

Mean (SD/95% CI) are not reported if the N is <5. CI, confidence interval; N, number of patients with available data at each time point. LS, Laron syndrome; non-NPP, not treatment naïve and/or pubertal; NPP, treatment-naïve and prepubertal; SD, standard deviation; SDS, standard deviation score.
