# Supplementary material for: Effectiveness and safety of rhIGF1 therapy in patients with or without Laron syndrome
Source: PubMed Central journal article supplement (PMC7849377; doi:10.1530/eje-20-0325), 2020-11-17
Supplement: supplementary_table_4.pdf [file supplementary_table_4.pdf]

**Table S4.** Effect of rhIGF-1 therapy on height velocity (cm/year; Registry population)

|         | Change from baseline                             |             |    |                    | Change from baseline                                  |             |    |                    |
|---------|--------------------------------------------------|-------------|----|--------------------|-------------------------------------------------------|-------------|----|--------------------|
|         | N                                                | Mean (SD)   | N  | Mean (95% CI)      | N                                                     | Mean (SD)   | N  | Mean (95% CI)      |
|         | <b>NPP-LS</b><br>( <i>n</i> = 21)                |             |    |                    | <b>NPP-non-LS</b><br>( <i>N</i> = 114)                |             |    |                    |
| 1 year  | 10                                               | 8.25 (2.54) | 4  | -                  | 87                                                    | 7.04 (1.96) | 52 | 2.42 (1.75; 3.10)  |
| 2 years | 7                                                | 6.87 (1.54) | 2  | -                  | 70                                                    | 6.13 (1.59) | 40 | 1.76 (1.06; 2.47)  |
| 3 years | 9                                                | 5.35 (1.57) | 2  | -                  | 58                                                    | 6.08 (1.82) | 34 | 1.36 (0.44; 2.28)  |
| 4 years | 7                                                | 5.35 (0.94) | 1  | -                  | 38                                                    | 5.60 (1.69) | 19 | 0.70 (-0.27; 1.67) |
| 5 years | 5                                                | 5.45 (1.10) | 0  | -                  | 21                                                    | 4.87 (1.84) | 10 | 1.12 (-0.07; 2.32) |
|         |                                                  |             |    |                    |                                                       |             |    |                    |
|         | <b>NPP-non-LS–responders</b><br>( <i>n</i> = 50) |             |    |                    | <b>NPP-non-LS–poor-responders</b><br>( <i>n</i> = 38) |             |    |                    |
| 1 year  | 50                                               | 8.06 (1.69) | 35 | 3.02 (2.31; 3.74)  | 37                                                    | 5.66 (1.36) | 17 | 1.18 (-0.19; 2.55) |
| 2 years | 38                                               | 6.18 (1.50) | 27 | 1.49 (0.78; 2.19)  | 29                                                    | 6.05 (1.79) | 13 | 2.34 (0.60; 4.08)  |
| 3 years | 31                                               | 5.95 (1.59) | 23 | 0.77 (-0.16; 1.70) | 20                                                    | 6.50 (2.22) | 9  | 2.43 (-0.30; 5.15) |
| 4 years | 19                                               | 5.56 (1.19) | 14 | 0.46 (-0.45; 1.36) | 11                                                    | 5.37 (1.88) | 4  | -                  |
| 5 years | 14                                               | 5.06 (2.04) | 8  | 1.01 (-0.52; 2.55) | 3                                                     | 4.64 (1.42) | 2  | -                  |
|         |                                                  |             |    |                    |                                                       |             |    |                    |
|         | <b>Non-NPP-LS</b>                                |             |    |                    | <b>Non-NPP-non-LS</b>                                 |             |    |                    |

|         | (n = 17) |             |    |                     | (n = 86) |             |    |                     |
|---------|----------|-------------|----|---------------------|----------|-------------|----|---------------------|
| 1 year  | 13       | 5.50 (2.88) | 10 | 0.38 (-1.32; 2.09)  | 59       | 6.48 (2.37) | 41 | 1.73 (0.86; 2.59)   |
| 2 years | 11       | 4.90 (2.38) | 9  | 0.04 (-1.40; 1.47)  | 35       | 6.00 (2.40) | 22 | 0.68 (-0.43; 1.79)  |
| 3 years | 10       | 3.42 (3.21) | 7  | -2.08 (-5.33; 1.17) | 25       | 5.72 (2.17) | 13 | 0.99 (-0.42; 2.41)  |
| 4 years | 7        | 4.55 (2.45) | 4  | -                   | 16       | 4.77 (2.11) | 7  | 0.18 (-1.70; 2.05)  |
| 5 years | 3        | 4.34 (1.07) | 2  | -                   | 9        | 4.35 (2.09) | 5  | -0.65 (-2.90; 1.60) |

Mean (SD/95% CI) are not reported if the N is <5. No statistical analysis was conducted for height velocity. Responders were defined as patients with change in height SDS in year 1 of  $\geq 0.3$ . Poor-responders were defined as patients with change in height SDS in year 1 of  $< 0.3$ . CI, confidence interval; N, number of patients with available data at each time point. LS, Laron syndrome; non-NPP, not treatment naïve and/or pubertal; NPP, treatment-naïve and prepubertal; SD, standard deviation; SDS, standard deviation score.
