# Supplementary material for: Effectiveness and safety of rhIGF1 therapy in patients with or without Laron syndrome
Source: PubMed Central journal article supplement (PMC7849377; doi:10.1530/eje-20-0325), 2020-11-17
Supplement: supplementary_table_5.pdf [file supplementary_table_5.pdf]

**Table S5.** Effect of rhIGF-1 therapy on BMI SDS (Registry population)

|         | Change from baseline                     |                   | Change from baseline                          |                   | P value <sup>a</sup> |
|---------|------------------------------------------|-------------------|-----------------------------------------------|-------------------|----------------------|
|         | N                                        | Mean (95% CI)     | N                                             | Mean (95% CI)     |                      |
|         | <b>NPP-LS</b><br>(n = 21)                |                   | <b>NPP-non-LS</b><br>(N = 114)                |                   |                      |
| 1 year  | 10                                       | 0.44 (0; 1.23)    | 77                                            | 0.11 (0; 0.24)    | 0.744                |
| 2 years | 10                                       | 0.55 (0; 1.53)    | 68                                            | 0.21 (0.08; 0.65) | 0.828                |
| 3 years | 9                                        | 0.78 (0; 1.89)    | 56                                            | 0.29 (0.11; 0.46) | 0.258                |
| 4 years | 8                                        | 0.99 (0; 2.16)    | 42                                            | 0.20 (0; 0.42)    | 0.142                |
| 5 years | 8                                        | 1.16 (0.19; 2.14) | 25                                            | 0.30 (0; 0.66)    | 0.062                |
|         |                                          |                   |                                               |                   |                      |
|         | <b>NPP-non-LS–responders</b><br>(n = 50) |                   | <b>NPP-non-LS–poor-responders</b><br>(n = 38) |                   | P value <sup>b</sup> |
| 1 year  | 44                                       | 0.10 (0; 0.31)    | 33                                            | 0.12 (0; 0.27)    | 0.930                |
| 2 years | 35                                       | 0.21 (0.01; 0.41) | 25                                            | 0.19 (0.01; 0.36) | 0.862                |
| 3 years | 30                                       | 0.21 (0; 0.47)    | 20                                            | 0.34 (0.12; 0.56) | 0.467                |
| 4 years | 23                                       | 0.11 (0; 0.44)    | 11                                            | 0.36 (0; 0.77)    | 0.357                |
| 5 years | 17                                       | 0.38 (0; 0.88)    | 5                                             | 0.29 (0.06; 0.52) | 0.875                |
|         |                                          |                   |                                               |                   |                      |
|         | <b>Non-NPP-LS</b><br>(n = 17)            |                   | <b>Non-NPP-non-LS</b><br>(n = 86)             |                   |                      |
| 1 year  | 14                                       | 0.01 (0.01; 0.32) | 56                                            | 0.35 (0.19; 0.52) | -                    |
| 2 years | 13                                       | -0.00 (0; 0.48)   | 37                                            | 0.45 (0.23; 0.66) | -                    |
| 3 years | 9                                        | 0.06 (0; 0.49)    | 24                                            | 0.51 (0.26; 0.76) | -                    |
| 4 years | 8                                        | 0.35 (0; 1.27)    | 15                                            | 0.56(0.25; 0.88)  | -                    |
| 5 years | 4                                        | 0.17 (0; 1.27)    | 10                                            | 0.70 (0.08; 1.32) | -                    |

<sup>a</sup>NPP-non-Laron syndrome versus NPP-Laron syndrome mean BMI SDS. <sup>b</sup>NPP-non-Laron syndrome responders versus NPP-non-Laron syndrome-poor responders mean BMI SDS. Responders were defined as patients with change in height SDS in year 1 of  $\geq 0.3$ . Poor-responders were defined as patients with change in height SDS in year 1 of  $< 0.3$ . CI, confidence interval; N, number of patients with available data at each time point. LS, Laron syndrome; non-NPP, not treatment naïve and/or pubertal; NPP, treatment-naïve and prepubertal; SDS, standard deviation score.
