# Supplementary material for: Effectiveness and safety of rhIGF1 therapy in patients with or without Laron syndrome
Source: PubMed Central journal article supplement (PMC7849377; doi:10.1530/eje-20-0325), 2020-11-17
Supplement: supplementary_table_6.pdf [file supplementary_table_6.pdf]

**Table S6.** Effect of rhIGF-1 therapy on weight SDS (Registry population)

|         | Change from baseline                     |                   | Change from baseline                          |                   | P value <sup>a</sup> |
|---------|------------------------------------------|-------------------|-----------------------------------------------|-------------------|----------------------|
|         | N                                        | Mean (95% CI)     | N                                             | Mean (95% CI)     |                      |
|         | <b>NPP-LS</b><br>(n = 21)                |                   | <b>NPP-non-LS</b><br>(N = 114)                |                   |                      |
| 1 year  | 11                                       | 0.81 (0.01; 1.61) | 88                                            | 0.37 (0.26; 0.49) | 0.298                |
| 2 years | 11                                       | 1.19 (0; 2.40)    | 77                                            | 0.70 (0.54; 0.87) | 0.419                |
| 3 years | 9                                        | 1.76 (0.12; 3.39) | 62                                            | 0.89 (0.70; 1.07) | 0.099                |
| 4 years | 8                                        | 2.01 (0.55; 3.48) | 46                                            | 1.05 (0.78; 1.32) | 0.022                |
| 5 years | 8                                        | 2.02 (0.49; 3.56) | 29                                            | 1.24 (0.88; 1.61) | 0.109                |
|         |                                          |                   |                                               |                   |                      |
|         | <b>NPP-non-LS–responders</b><br>(n = 50) |                   | <b>NPP-non-LS–poor-responders</b><br>(n = 38) |                   | P value <sup>b</sup> |
| 1 year  | 50                                       | 0.55 (0.39; 0.70) | 37                                            | 0.13 (0; 0.28)    | <0.001               |
| 2 years | 40                                       | 0.96 (0.77; 1.15) | 28                                            | 0.24 (0.04; 0.45) | <0.001               |
| 3 years | 33                                       | 1.05 (0.79; 1.31) | 22                                            | 0.57 (0.27; 0.88) | 0.017                |
| 4 years | 25                                       | 1.17 (0.76; 1.58) | 12                                            | 0.74 (0.18; 1.30) | 0.189                |
| 5 years | 20                                       | 1.42 (0.95; 1.88) | 5                                             | 0.41 (0; 1.33)    | 0.038                |
|         |                                          |                   |                                               |                   |                      |
|         | <b>Non-NPP-LS</b>                        |                   | <b>Non-NPP non-LS</b>                         |                   |                      |

|         | (n = 17) |                   | (n = 86) |                   |   |
|---------|----------|-------------------|----------|-------------------|---|
| 1 year  | 14       | 0.27 (0; 0.58)    | 63       | 0.42 (0.27; 0.58) | - |
| 2 years | 13       | 0.50 (0.14; 0.85) | 41       | 0.76 (0.50; 1.03) | - |
| 3 years | 9        | 0.51 (0.22; 0.79) | 27       | 1.02 (0.63; 1.42) | - |
| 4 years | 8        | 0.97 (0.05; 1.89) | 18       | 1.28 (0.94; 1.61) | - |
| 5 years | 4        | 1.10 (0.31; 1.89) | 10       | 1.43 (1.05; 1.82) | - |

<sup>a</sup>NPP-non-Laron syndrome versus NPP-Laron syndrome mean weight SDS. <sup>b</sup>NPP-non-Laron syndrome responders versus NPP-non-Laron syndrome-poor responders mean weight SDS. Responders were defined as patients with change in height SDS in year 1 of  $\geq 0.3$ . Poor-responders were defined as patients with change in height SDS in year 1 of  $< 0.3$ . CI, confidence interval; N, number of patients with available data at each time point. LS, Laron syndrome; non-NPP, not treatment naïve and/or pubertal; NPP, treatment-naïve and prepubertal; SDS, standard deviation score.
